# Supplementary material
Source: publisher figshare collection journal article supplement (https://plos.figshare.com/articles/dataset/_/7055939)
Supplement: Supplementary file [file 1]

## Coding frame

| Conceptual framework | Themes                       | Sub-themes                            |
|----------------------|------------------------------|---------------------------------------|
| Classroom training   | Knowledge gained             | Malaria in pregnancy                  |
|                      |                              | Change in IPTp guidelines             |
|                      |                              | Content of IPTp guidelines            |
|                      |                              | Provision practices                   |
|                      |                              | Contraindications                     |
|                      |                              | Adverse effects of SP                 |
|                      |                              | Data recording                        |
|                      | Attendees                    | Selection of health workers to attend |
|                      |                              | Number of staff to attend             |
|                      | Format and logistics         | Frequency of trainings                |
|                      |                              | Topics of trainings                   |
|                      |                              | Attendee expenses                     |
|                      |                              | Cost of training                      |
|                      | Opinions                     | Structure                             |
|                      |                              | Clarity                               |
|                      |                              | Content                               |
|                      |                              | General opinions                      |
| Post-training        | On-the-job training          | Frequency                             |
|                      |                              | Format                                |
|                      | Follow-up classroom training | Demand                                |

|                     |                     |                                 |
|---------------------|---------------------|---------------------------------|
|                     |                     | Frequency                       |
|                     | Changes in practice | Malaria in pregnancy management |
|                     |                     | Provision of IPTp               |
|                     |                     | Recording practices             |
|                     |                     | Information sharing             |
| Information cascade | Barriers            | Attitudes                       |
|                     |                     | Staff turnover                  |
|                     |                     | Time constraints                |
|                     |                     | CME                             |
|                     |                     | Other                           |
|                     | Facilitators        | How information is shared       |
|                     |                     | What information is shared      |
|                     |                     | When information is shared      |
|                     |                     | Who information is shared with  |
|                     | Mechanisms          | CME                             |
|                     |                     | Text messages                   |
|                     |                     | Other                           |
|                     | Opinions            | Cascade approach                |
|                     |                     | Other                           |
| Text messages       | Content             | Text messages                   |
|                     | Purpose             | Reminder                        |

|                             |                 |                            |
|-----------------------------|-----------------|----------------------------|
|                             |                 | Information sharing        |
|                             |                 | Engagement                 |
|                             |                 | Teaching new staff         |
|                             | Format          | Timing                     |
|                             |                 | Language                   |
|                             | Delivery        | Internet                   |
|                             |                 | mTrac                      |
|                             |                 | Network                    |
|                             |                 | Updating contact details   |
|                             |                 | Setting up messages        |
|                             |                 | Sending messages           |
|                             |                 | Costs                      |
|                             |                 | Problems                   |
|                             | Scalability     | Roles and responsibilities |
|                             |                 | Other topics               |
|                             |                 | Other audiences            |
|                             |                 | Other geographies          |
| Training plus text messages | Combined effect | Value added                |
|                             |                 | Complementarity            |
| Data recording              | Tools           | ANC register               |
|                             |                 | ANC cards                  |
|                             | Job aid         | Availability               |
|                             |                 | Use                        |

|                    |                             |                                       |
|--------------------|-----------------------------|---------------------------------------|
|                    |                             | Non-use                               |
|                    |                             | Opinions                              |
|                    |                             | Suggestions                           |
| Context            | Population                  | Migration and changes                 |
|                    |                             | Conflict                              |
|                    | Climate                     | Rain                                  |
|                    | Other programmes            | mHealth interventions                 |
|                    |                             | Health service delivery interventions |
|                    |                             | Implementing partners                 |
| Health system      | Supervision                 | Frequency                             |
|                    |                             | Format                                |
|                    |                             | Topics                                |
|                    |                             | Barriers                              |
|                    | Stock-outs                  | Stock levels                          |
|                    |                             | Redistribution                        |
|                    |                             | Supply chain                          |
| Malaria Consortium | Text messaging intervention | Awareness                             |
|                    |                             | Information                           |
|                    |                             | Purpose                               |
|                    | General                     | Comments on work                      |
|                    |                             | Requests for support                  |
