# Supplementary material
Source: publisher figshare collection journal article supplement (https://plos.figshare.com/articles/dataset/_/7055939)
Supplement: Supplementary file [file 1]

## Text messages and text messages log

| Date sent | Text message                                                                                                                                              | System errors |
|-----------|-----------------------------------------------------------------------------------------------------------------------------------------------------------|---------------|
| 29/06/15  | Over the next few weeks, you will receive messages about the dangers of malaria in pregnancy and the importance of providing IPTp to women attending ANC. | None          |
| 29/06/15  | You will receive about 20 messages in total. The first message will be sent on Tuesday, 30 June, from this number: 6767. Please share with colleagues.    | None          |
| 30/06/15  | When a pregnant woman has malaria, it is dangerous for the mother and her unborn child. In the most severe case, both mother and baby can die.            | None          |
| 1/07/15   | Pregnant women are more susceptible to malaria because their immunity is low. Malaria in pregnancy will cause severe anaemia in many pregnant women.      | None          |
| 2/07/15   | Malaria in pregnancy is a leading cause of spontaneous abortion. If the baby survives, it may often be weak and more likely to get sick.                  | None          |
| 3/07/15   | The malaria parasite will often hide in a pregnant woman's placenta and may not be detectable in her bloodstream.                                         | None          |
| 6/07/15   | Even pregnant women who look and feel well may have malaria. This is why all women should receive medication to protect them from the disease.            | None          |

|          |                                                                                                                                                           |      |
|----------|-----------------------------------------------------------------------------------------------------------------------------------------------------------|------|
| 07/07/15 | Pregnant women should receive a drug called SP monthly beginning in the second trimester to prevent adverse consequences of malaria. This is called IPTp. | None |
| 08/07/15 | The first dose of SP should be given as early as possible during the second trimester. SP is safe until the time of delivery.                             | None |
| 09/07/15 | More doses of IPTp increase women's protection from malaria. IPTp should be given repeatedly as long as there are 4 weeks between doses.                  | None |
| 10/07/15 | You should give IPTp whenever a woman attends ANC after the first trimester until delivery, as long as there are at least 4 weeks between doses.          | None |
| 13/07/15 | IPTp should always be taken at the health facility under the supervision of a health worker (DOT).                                                        | None |
| 14/07/15 | SP is safe to take on an empty stomach and women should be encouraged to take IPTp at the facility regardless of whether or not they have eaten.          | None |
| 15/07/15 | SP works less well these days as malaria treatment, but is still very effective at reducing the number of malaria parasites in the placenta.              | None |
| 16/07/15 | Sometimes, women may experience mild side effects like nausea or dizziness after taking SP, but they should still be encouraged to take the medication.   | None |

|          |                                                                                                                                                           |      |
|----------|-----------------------------------------------------------------------------------------------------------------------------------------------------------|------|
| 17/07/15 | Only those who experienced severe side effects such as a rash or difficulties breathing after taking IPTp should not receive SP. Such instances are rare. | None |
| 20/07/15 | Pregnant women who are taking co-trimoxazole or other sulpha-containing drugs should not be given IPTp. Many HIV positive women take co-trimoxazole.      | None |
| 21/07/15 | Most women trust health workers. When providing IPTp, tell women why IPTp is important and that it is safe. Encourage them to take the medication as DOT. | None |
| 22/07/15 | Remind women attending ANC that for added protection from malaria in pregnancy, they should also sleep under an insecticide treated mosquito net.         | None |
| 23/07/15 | Also remind pregnant women attending ANC to visit a health centre immediately if they have any signs of malaria to test and receive treatment.            | None |
| 24/07/15 | Remember: give IPTp whenever a woman attends ANC after the first trimester until delivery, as long as there are at least 4 weeks between doses.           | None |
| 27/07/15 | There is no danger in taking SP on an empty stomach. Mild side effects are possible, but are outweighed by the benefit of a healthier pregnancy.          | None |
| 28/07/15 | Remember to record every dose of SP you provide in the ANC register and on the ANC card and the mother's ANC card.                                        | None |

|          |                                                                                                                                                        |      |
|----------|--------------------------------------------------------------------------------------------------------------------------------------------------------|------|
| 29/07/15 | This is the last message about malaria in pregnancy and IPTp. If you have any questions, don't hesitate to ask your in-charge or district health team. | None |
|----------|--------------------------------------------------------------------------------------------------------------------------------------------------------|------|
